# Supplementary material for: Using a simple point-prevalence survey to define appropriate antibiotic prescribing in hospitalised children across the UK
Source: PubMed Central journal article supplement (PMC5129034; doi:10.1136/bmjopen-2016-012675), 2016-11-03
Supplement: bmjopen-2016-012675supp_table.pdf [file bmjopen-2016-012675supp_table.pdf]

Supplemental table: Characteristics of paediatric hospitals across the United Kingdom (during the three one-day point prevalence surveys in 2011-12)

|                                             | N patients (%) | N beds      | Bed occupancy |
|---------------------------------------------|----------------|-------------|---------------|
| District general hospitals<br>(44 centres)  | 958 (31.4)     | 1604        | 59.7%         |
| Tertiary referral hospitals<br>(17 centres) | 2089 (68.6)    | 2542        | 82.2%         |
| General Paediatric                          | 1477 (48.5)    | 2235        | 66.1%         |
| PICU - Paediatric<br>Intensive Care Unit    | 226 (7.4)      | 265         | 85.3%         |
| Paediatric Surgery                          | 597 (19.6)     | 789         | 75.7%         |
| Haematology-oncology-<br>transplant         | 144 (4.7)      | 195         | 73.8%         |
| Others                                      | 603 (19.8)     | 662         | 91.1%         |
| <b>Total (N centres = 61)</b>               | <b>3047</b>    | <b>4146</b> | <b>73.5%</b>  |
